# Supplementary material for: Altered GNAS imprinting due to folic acid deficiency contributes to poor embryo development and may lead to neural tube defects
Source: PubMed Central journal article supplement (PMC5762285; doi:10.18632/oncotarget.22731), 2017-11-28
Supplement: oncotarget-08-110797-s001.pdf [file oncotarget-08-110797-s001.pdf]

## Altered GNAS imprinting due to folic acid deficiency contributes to poor embryo development and may lead to neural tube defects

### SUPPLEMENTARY MATERIALS

#### Tissue specific methylation levels of DMRs in the Gnas imprinting cluster in E13.5 mouse fetuses in maternal folate-deficient (MD) group

The effect of maternal folate deficiency on Gnas imprinting patterns was measured in various tissues. Fetal liver, maternal liver and placental tissue, which are linked to folate reserves and exchange between dam and offspring were selected. Data are shown in Supplementary Table 3. In fetal liver, there was a small but significant methylation decrease in the Exon1A/Gnas gDMR in the MD group (33.5% vs. 35.2%). However, in the placenta methylation level in this region was increased (25.4% vs. 23.2%;  $P < 0.05$ ). In the case of Nespas gDMR, no significant difference in the overall methylation level of this region was found in fetal liver and

placental tissue, similar results were found in the Nesp DMR region, which is paternally imprinted. In the maternal liver, although the folate concentration was significantly lower in the MD group, the methylation levels of all three DMRs, whose methylation patterns had already been established, were not affected by periconceptional folate deficiency. The greatest difference in the methylation level of the Exon1A/Gnas gDMR between the MD and PS groups was found in the embryonic brains. Meanwhile, our data show a striking reduction in the methylation level at chr2:174,120,698–174,120,842, located at the 3' region of the Nespas gDMR in fetal brain (33.1% vs. 46.1%;  $P < 0.001$ , Supplementary Figure 2).

**Supplementary Table 1: Basic composition of mouse diet (g/kg)**

| Ingredient              | Control | Folate-deficient diet group |
|-------------------------|---------|-----------------------------|
| Cornstarch              | 380.500 | 380.500                     |
| Amino acids mix*        | 200.000 | 200.000                     |
| Dextrinized cornstarch  | 152.000 | 132.000                     |
| Sucrose                 | 100.000 | 100.000                     |
| Soybean oil             | 70.000  | 70.000                      |
| Fiber                   | 50.000  | 50.000                      |
| Mineral mix*            | 35.000  | 35.000                      |
| Vitamin Mix*            | 10.000  | –                           |
| w/o Folate Vitamin Mix* | –       | 10.000                      |
| Choline bitartrate      | 2.500   | 2.500                       |

**Supplementary Table 2: List of primers used in manuscript**

| mouse             |                                                    |                                                                      |                    |                                  |
|-------------------|----------------------------------------------------|----------------------------------------------------------------------|--------------------|----------------------------------|
| Primer            | Left Primer                                        | Right Primer                                                         | Region             | Target Location                  |
| Nespas 1          | 5'-aggaagagagTATAGTAAGATGTTTTG<br>ATTGAATAGAAGG-3' | 5'-cagtaatacactcactataggagaaggctTCTAAAA<br>ACTTAATCAAATCCTAATCT-3'   | Nespas DMR         | chr2:174,119,977–<br>174,120,276 |
| Nespas 2          | 5'-aggaagagagTTGAATTTGTATAAGG<br>TGAAAGGT-3'       | 5'-cagtaatacactcactataggagaaggctAAAAACC<br>TTCTCTTCCATTTTCAT-3'      | Nespas DMR         | chr2:174,120,331–<br>174,120,629 |
| Nespas 3          | 5'-aggaagagagAGGTGGGAAGGTTAG<br>GGATTTTAT-3'       | 5'-cagtaatacactcactataggagaaggctCTCTCTT<br>TCTCCATAAACCTAACCC-3'     | Nespas DMR         | chr2:174,120,698–<br>174,120,842 |
| Nespas 4          | 5'-aggaagagagTAGGTTAGTTATGGGT<br>TGGGGTTA-3'       | 5'-cagtaatacactcactataggagaaggctCCCAAAA<br>AATAATCCATAAAAAATCC-3'    | Nespas DMR         | chr2:174,120,803–<br>174,121,095 |
| Nespas 5          | 5'-aggaagagagGGTTAATTGGGTTTAA<br>TTATTAGTTT-3'     | 5'-cagtaatacactcactataggagaaggctAACTTAA<br>CCCCAAAACACTCAC-3'        | Nespas DMR         | chr2:174,120,869–<br>174,121,143 |
| Nespas 6          | 5'-aggaagagagGGGTATATTGTAAGATG<br>TATGTTGTGTGT-3'  | 5'-cagtaatacactcactataggagaaggctCCAAACT<br>TTAAACCAAAAATCAAAA-3'     | Nespas DMR         | chr2:174,121,216–<br>174,121,469 |
| Exon1A/<br>Gnas 1 | aggaagagagAGTTTTTTAGGTGGGA<br>GAGGTG               | cagtaatacactcactataggagaaggctTAAAAACA<br>TTCTCCAAAAATCA              | Exon1A/Gnas<br>DMR | chr2:174,152,547–<br>174,152,657 |
| Exon1A/<br>Gnas 2 | 5'-aggaagagagTTATTTGGGAAGTTGA<br>GGTAAGAA-3'       | 5'-cagtaatacactcactataggagaaggctCCTAAAC<br>CTACCTCCCAATTTTC-3'       | Exon1A/Gnas<br>DMR | chr2:174,152,875–<br>174,152,992 |
| Exon1A/<br>Gnas 3 | 5'-aggaagagagAAAATTGGGAGGTAGG<br>TTTAGGAG-3'       | 5'-cagtaatacactcactataggagaaggctCCCAAC<br>CTCTTCAAAAAAC-3'           | Exon1A/Gnas<br>DMR | chr2:174,152,971–<br>174,153,211 |
| Exon1A/<br>Gnas 4 | 5'-aggaagagagTTTTGTTGTTGTTGGG<br>TGTTTTT-3'        | 5'-cagtaatacactcactataggagaaggctATAACCA<br>TCTTCAACATAATACCC-3'      | Exon1A/Gnas<br>DMR | chr2:174,153,775–<br>174,154,070 |
| Exon1A/<br>Gnas 5 | 5'-aggaagagagAGATGGAGAAGAAGTT<br>GTTGGAGTA-3'      | 5'-cagtaatacactcactataggagaaggctTCTTCAT<br>CAATATCACTATCCCATTC-3'    | Exon1A/Gnas<br>DMR | chr2:174,154,289–<br>174,154,556 |
| Nesp 1            | aggaagagagGAGGAGAGTAATGGAGT<br>AGGAGAGTT           | cagtaatacactcactataggagaaggctAATTAAAAAT<br>CTTCAAACCCCAACTT          | Nesp DMR           | chr2:174,110,043–<br>174,110,300 |
| Nesp 2            | aggaagagagTTGAAGATTAATTTTGT<br>AGGAGGG             | cagtaatacactcactataggagaaggctAACTCTTCA<br>AATCTCTCAAAAACAC           | Nesp DMR           | chr2:174,111,108–<br>174,111,358 |
| human             |                                                    |                                                                      |                    |                                  |
| Nespas 1          | 5'-aggaagagagTTTTAAGGTTAAGAA<br>GGTATTTTGG-3'      | 5'-cagtaatacactcactataggagaaggctCTTTAAC<br>TAAACCCCTCTCC-3'          | Nespas DMR         | chr20:56,863,612–<br>56,863,900  |
| Nespas 2          | 5'-aggaagagagTTGTTAGAAAGTTTAA<br>GGGAGGGAT-3'      | 5'-cagtaatacactcactataggagaaggctCCACCAA<br>CCTAACCAAAAAAATC-3'       | Nespas DMR         | chr20:56,863,912–<br>56,864,157  |
| Exon1A/<br>Gnas 1 | aggaagagagTGTTTTTGGTTTGT<br>TGTTTTT                | cagtaatacactcactataggagaaggctCATAACCAT<br>CTTCAACATAATAACCC          | Exon1A/Gnas<br>DMR | chr20:56,898,139–<br>56,898,354  |
| Nesp 1            | 5'-aggaagagagGTTAAATTGGGGAGTT<br>TGAGGG-3'         | 5'-cagtaatacactcactataggagaaggctCAACAAA<br>CCTTTAACCACAAAAC-3'       | Nesp DMR           | chr20:56,849,351–<br>56,849,547  |
| Nesp 2            | 5'-aggaagagagTTTTAAATAAGTTGGTT<br>TTTTTAGGTGT-3'   | 5'-cagtaatacactcactataggagaaggctCTTAATTA<br>TCAACTTAAAACCTAAACTCC-3' | Nesp DMR           | chr20:56,849,718–<br>56,849,950  |
| Real-Time<br>PCR  |                                                    |                                                                      |                    |                                  |
| Nespas            | GATGCCCTAAATCGCCAAGG                               | TGTGCAGGGTTCAGCATCTC                                                 |                    |                                  |
| Exon1A            | ACATAGCTAACCCAAGGAGCAC                             | CCTGCACCTTGTAGTGGCCTTCT                                              |                    |                                  |
| Gnas              | TCGGCAACAGTAAGACCGAG                               | TGCTTTTGCCAGACTCTCCA                                                 |                    |                                  |
| Gapdh             | TGTGTCCGTCGTGGATCTGA                               | CCTGCTCACCACCTTCTTGA                                                 |                    |                                  |
| EpiQ              |                                                    |                                                                      |                    |                                  |
| GNAS              | GGCGTGCCCGTACCCTCAATAGAT                           |                                                                      |                    |                                  |
| GNAS              | CTAACCCAGCCTGATGACGCCCAAC                          |                                                                      |                    |                                  |

**Supplementary Table 3: Tissue specific methylation levels of DMRs in Gnas imprinting cluster between maternal folate deficient group and the normal group<sup>1</sup>**

|                |    | Nespas DMR (%) | Exon1A/Gnas DMR (%) | Nesp DMR (%) |
|----------------|----|----------------|---------------------|--------------|
| Fetal brain    | MD | 43.5 ± 2.6     | 33.4 ± 2.8*         | 41.1 ± 3.1   |
|                | PS | 42.7 ± 2.2     | 38.3 ± 3.0          | 41.4 ± 4.7   |
| Fetal liver    | MD | 37.6 ± 2.1     | 33.5 ± 0.9*         | 42.7 ± 2.9   |
|                | PS | 38.9 ± 1.6     | 35.2 ± 1.3          | 41.0 ± 2.1   |
| placenta       | MD | 40.4 ± 1.7     | 25.4 ± 2.0*         | 42.9 ± 2.0   |
|                | PS | 39.4 ± 1.2     | 23.2 ± 1.0          | 44.6 ± 2.6   |
| Maternal liver | MD | 44.1 ± 4.2     | 39.4 ± 3.7          | 47.0 ± 8.0   |
|                | PS | 46.8 ± 5.9     | 41.3 ± 4.7          | 46.9 ± 6.9   |

All values are the mean ± SD. \* $P \leq 0.05$  by Student's *t*-test.

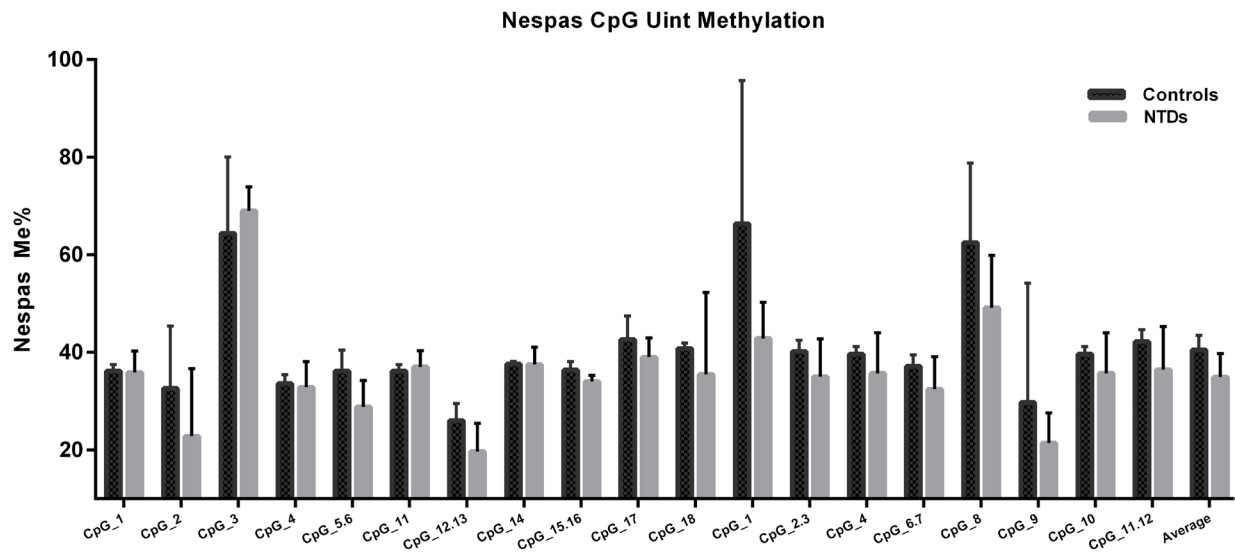

**Supplementary Figure 1: Methylation level of CpG sites in the Nespas gDMR in brain tissues between NTD cases and controls.** All values are the mean ± SD, \* $P < 0.05$ .

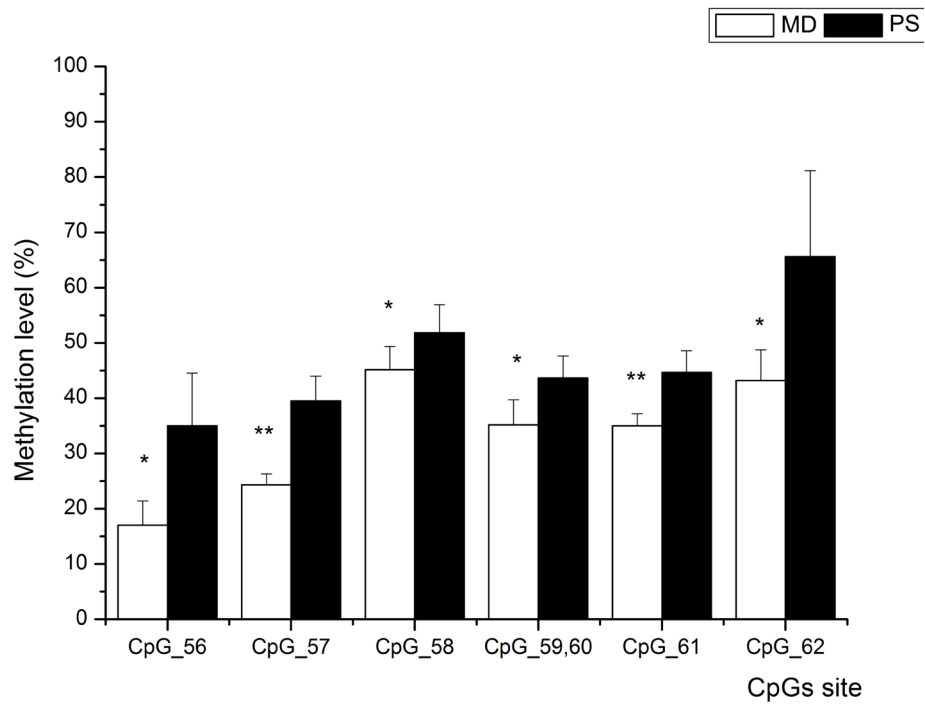

**Supplementary Figure 2: The methylation levels of every CpG site at chr2:174,120,698–174,120,842 located in 3' of the Nespas gDMR in E 13.5 fetal mouse fetal brain. All values are mean  $\pm$  SD, \* $P < 0.05$ .**
